# Supplementary material for: Water-compatible molecularly imprinted polymers prepared using metal–organic gel as porogen
Source: Royal Society of Chemistry journal article supplement (doi:10.1039/c5ra16029d), 2015-01-01
Supplement: c5ra16029d1.pdf [file c5ra16029d1.pdf]

## Electronic Supplementary Information (ESI)

### **Water-compatible    molecularly    imprinted    polymers prepared using metal-organic gel as porogen**

Li Ma    Lei Tang    Rong-Shan Li    Yan-Ping Huang\*    Zhao-Sheng Liu

*Tianjin Key Laboratory on Technologies Enabling Development of Clinical  
Therapeutics and Diagnostics (Theranostics), School of Pharmacy, Tianjin Medical  
University, Tianjin 300070, China*

Correspondence: Dr. Yan-Ping Huang,

E-mail: [huangyp100@163.com](mailto:huangyp100@163.com)

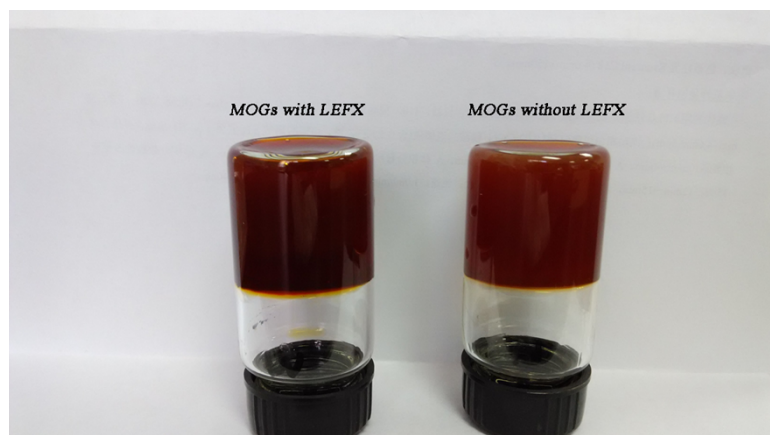

**Fig. S1** Image of MOGs containing LEFX and without containing LEFX

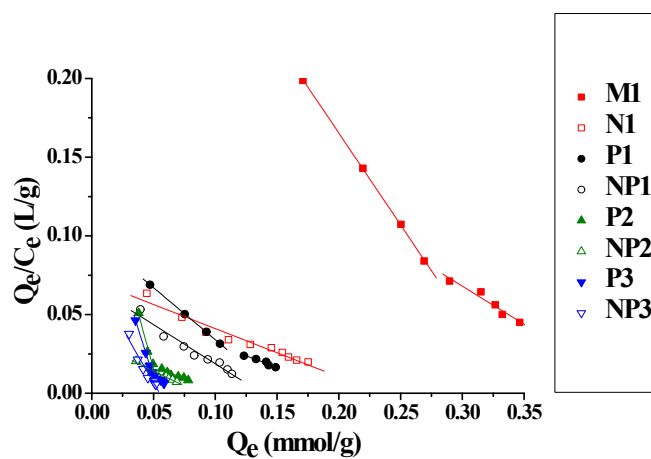

**Fig. S2** Scatchard analysis of LEFX on the MIPs and NIPs with different of blank controls.  $V=3.0$  mL,  $C_0=0-10$  mmol/L,  $t=5$  h, 20 mg of the polymers. M1: MIP- $\text{Fe}^{3+}$ - $\text{H}_3\text{BTC}$ ; N1: NIP- $\text{Fe}^{3+}$ - $\text{H}_3\text{BTC}$ ; P1: MIP- $\text{Fe}^{3+}$ ; NP1: NIP- $\text{Fe}^{3+}$ ; P2: MIP- $\text{H}_3\text{BTC}$ ; NP2: NIP- $\text{H}_3\text{BTC}$ . P3: MIP; NP3: NIP.

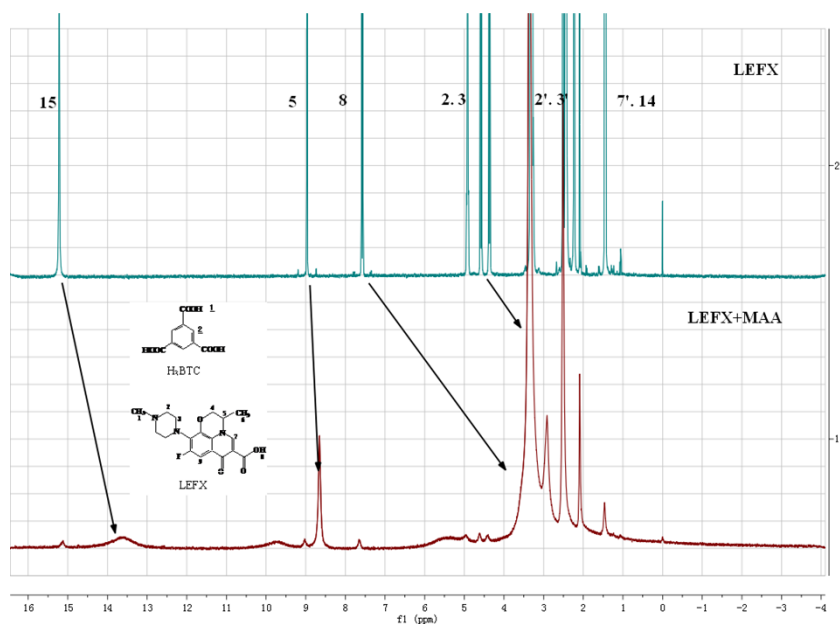

Fig. S3a Comparison of  $^1\text{H-NMR}$  spectroscopy of and LEFX+MAA

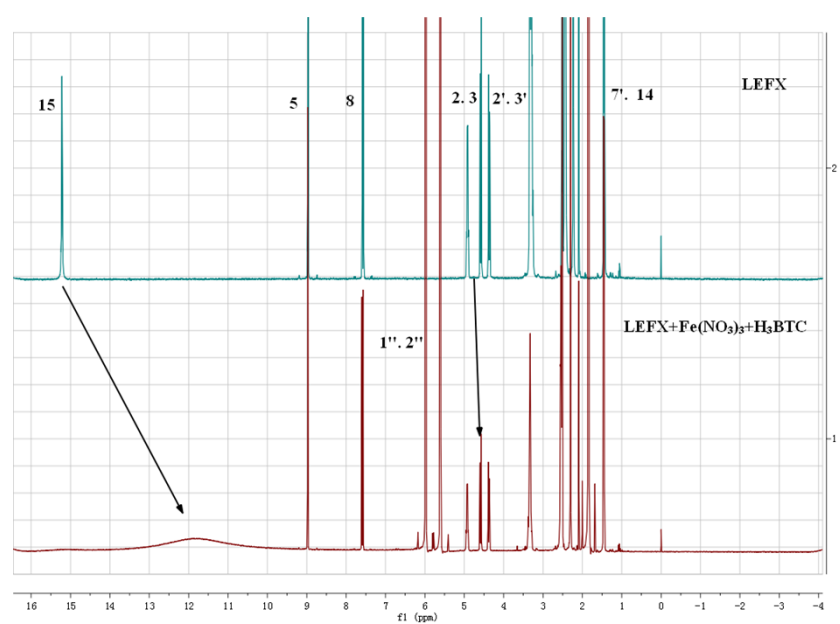

Fig. S3b Comparison of  $^1\text{H-NMR}$  spectroscopy of LEFX and LEFX + Fe(NO<sub>3</sub>)<sub>3</sub>+H<sub>3</sub>BTC

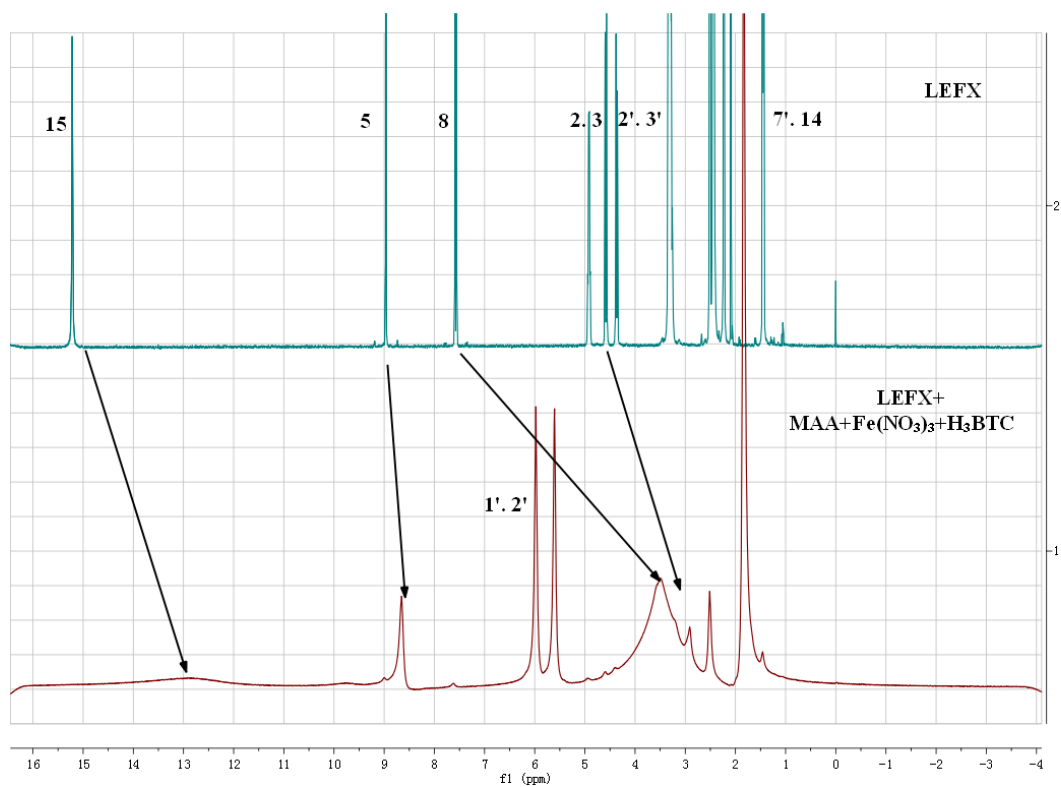

Fig. S3c Comparison of  $^1\text{H-NMR}$  spectroscopy of LEFX and LEFX +  $\text{Fe}(\text{NO}_3)_3 + \text{H}_3\text{BTC} + \text{MAA}$

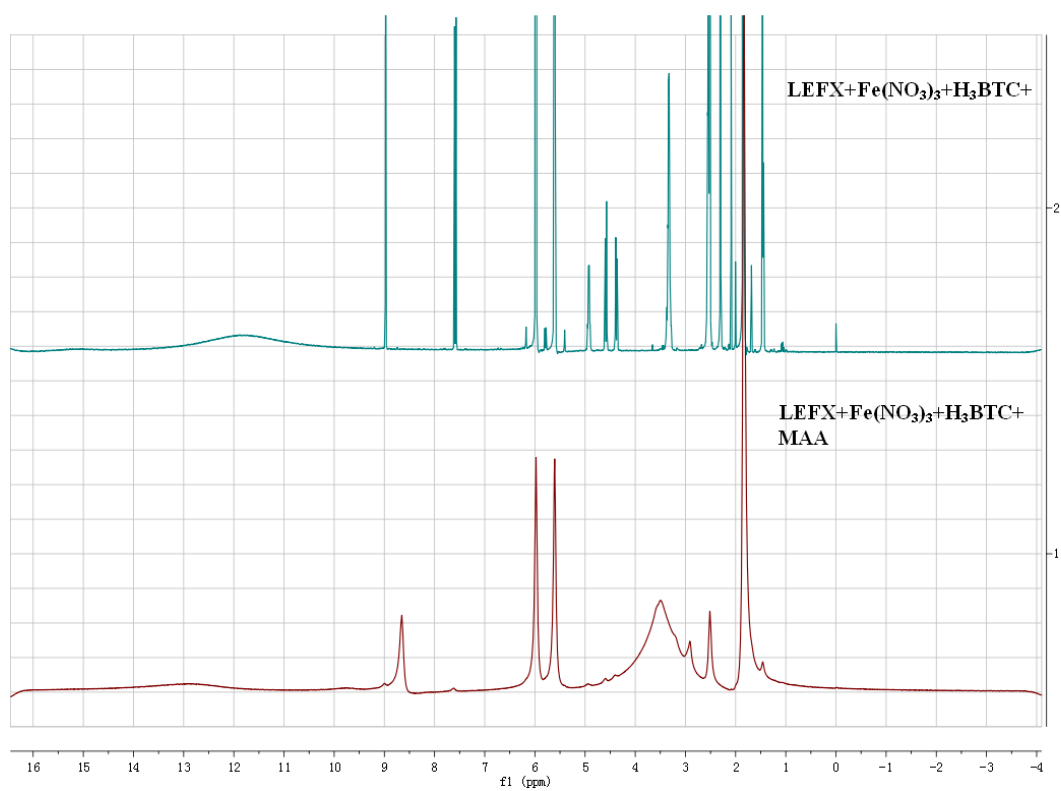

Fig. S3d Comparison of  $^1\text{H-NMR}$  spectroscopy of LEFX +  $\text{Fe}(\text{NO}_3)_3 + \text{H}_3\text{BTC}$  and LEFX +  $\text{Fe}(\text{NO}_3)_3 + \text{H}_3\text{BTC} + \text{MAA}$

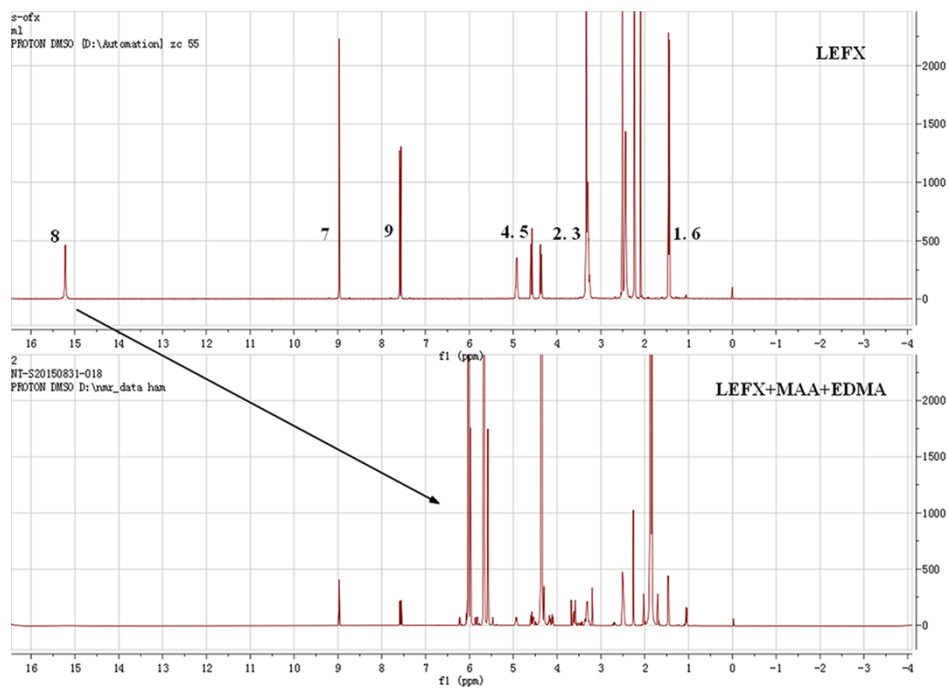

Fig. S3e Comparison of  $H^1$ -NMR spectroscopy of LEFX and LEFX +MAA+EDMA

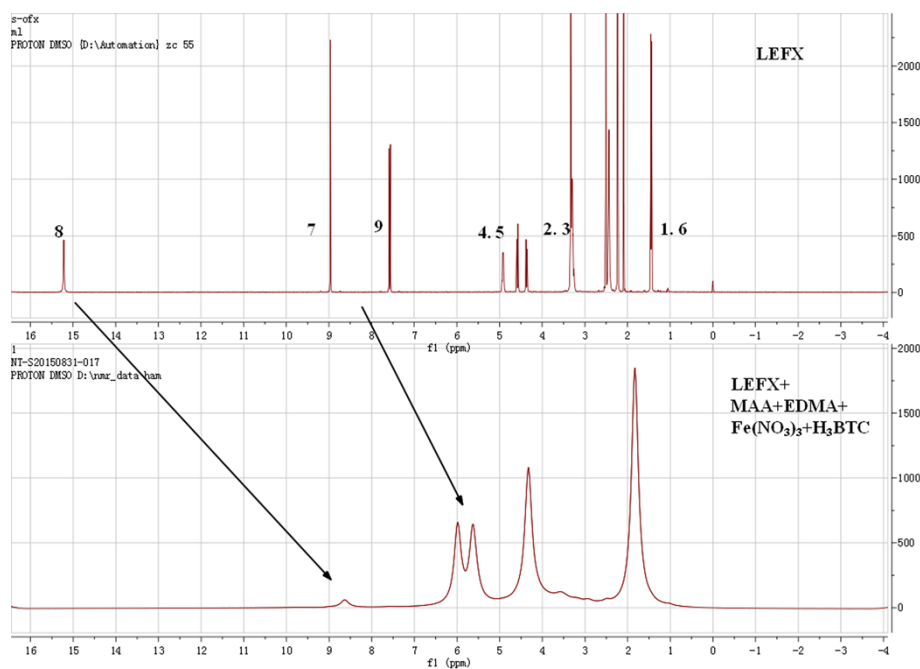

Fig. S3f Comparison of  $H^1$ -NMR spectroscopy of LEFX and LEFX +  $Fe(NO_3)_3+H_3BTC$  +MAA+EDMA

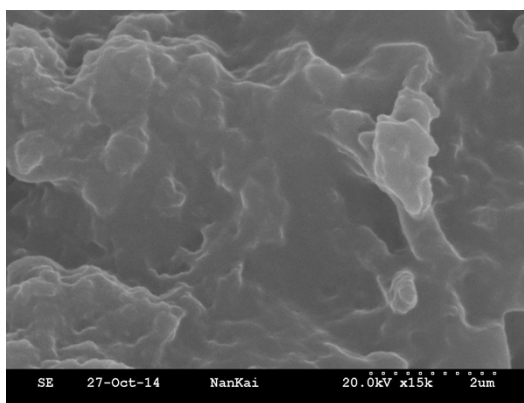

**Fig. S4** Scanning electron micrographs of  $\text{Fe}^{3+}$ - $\text{H}_3\text{BTC}$  hydrogel.

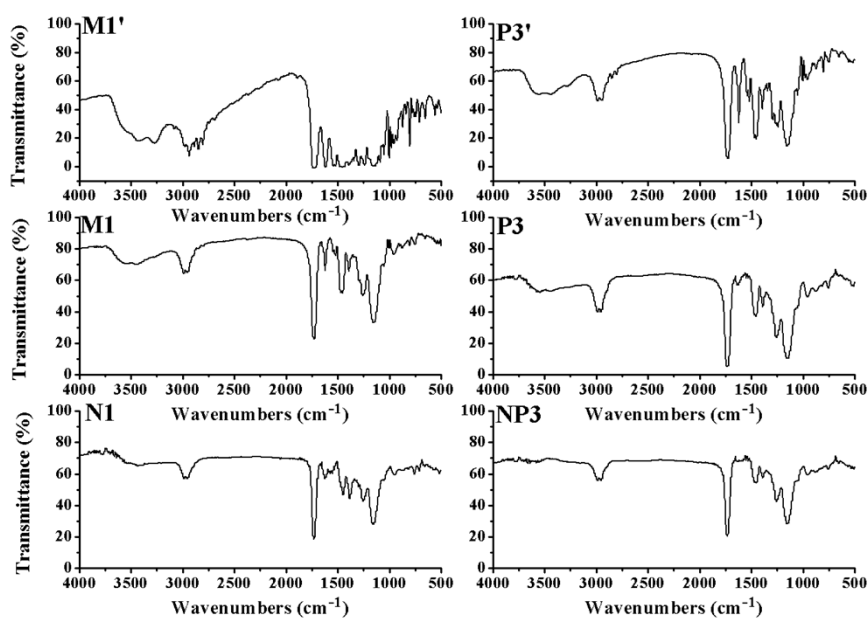

**Fig. S5** The infrared spectroscopy of different polymers. M1': MIP- $\text{Fe}^{3+}$ - $\text{H}_3\text{BTC}$  before remove template; M1: MIP- $\text{Fe}^{3+}$ - $\text{H}_3\text{BTC}$ ; N1: NIP- $\text{Fe}^{3+}$ - $\text{H}_3\text{BTC}$ ; P3': MIP before remove template; P3: MIP; NP3: NIP

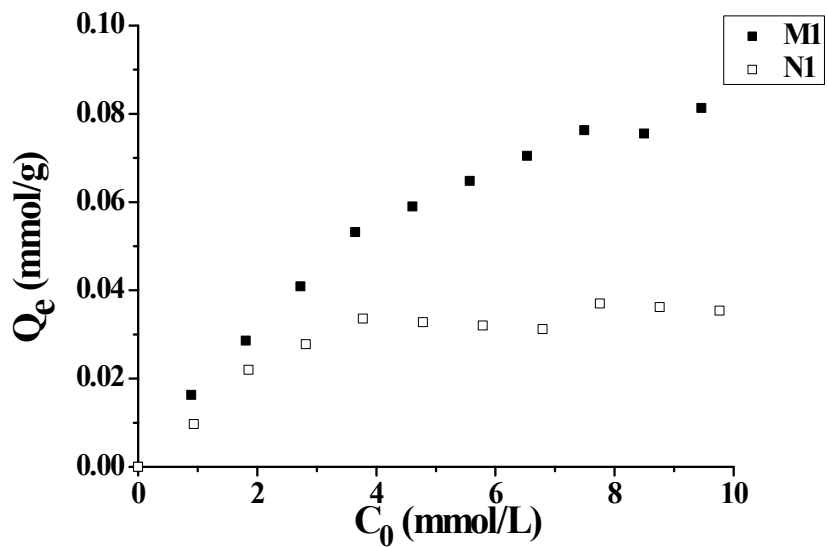

**Fig. S6** Adsorption isotherms of LEFX on the MIPs and NIPs in water containing Fe(III). M1: MIP; N1: NIP.

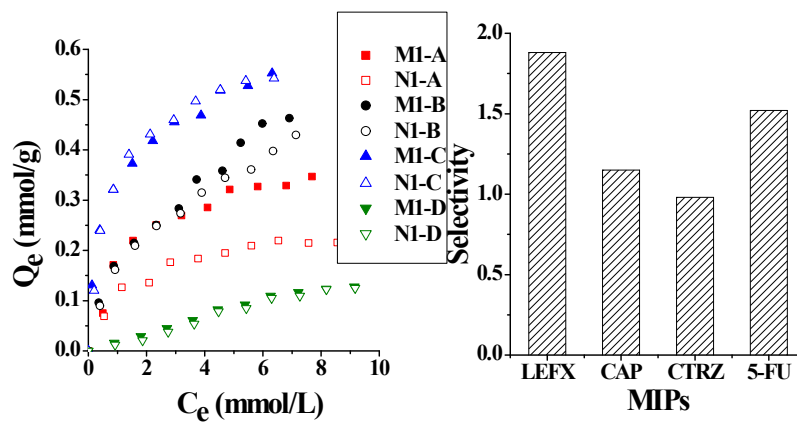

**Fig. S7** Adsorption isotherms of LEFX and nonanalogues on the MIPs and NIPs.  $V=3.0$  mL,  $C_0=0-10$  mmol/L,  $t=5$  h, 20 mg of the polymers. A: LEFX is the template; B: CAP; C: CTRZ; D: 5-FU. CAP, CTRZ and 5-FU are nonanalogues.

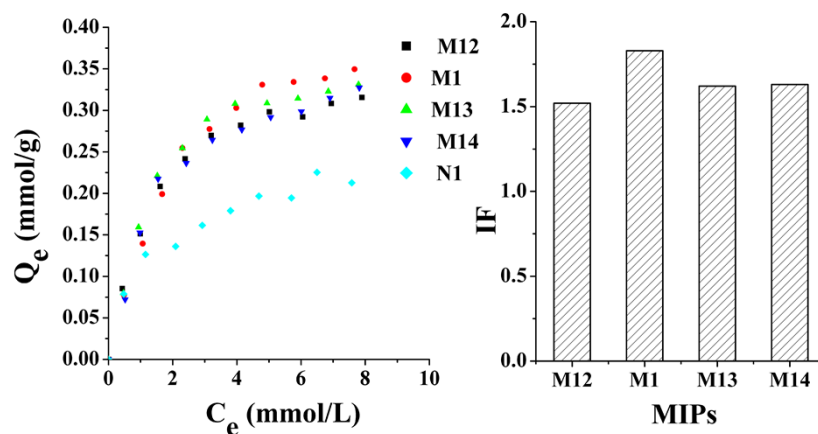

**Fig. S8** Adsorption isotherms of LEFX on the MIPs and NIPs with different molar ratio of template to functional monomer.  $V = 3.0$  mL,  $C_0 = 0-10$  mmol/L,  $t = 5$  h, 20 mg of the polymers. M7: T/M=1/6; M1: T/M=1/8; M8: T/M=1/10; M9: T/M=1/12.

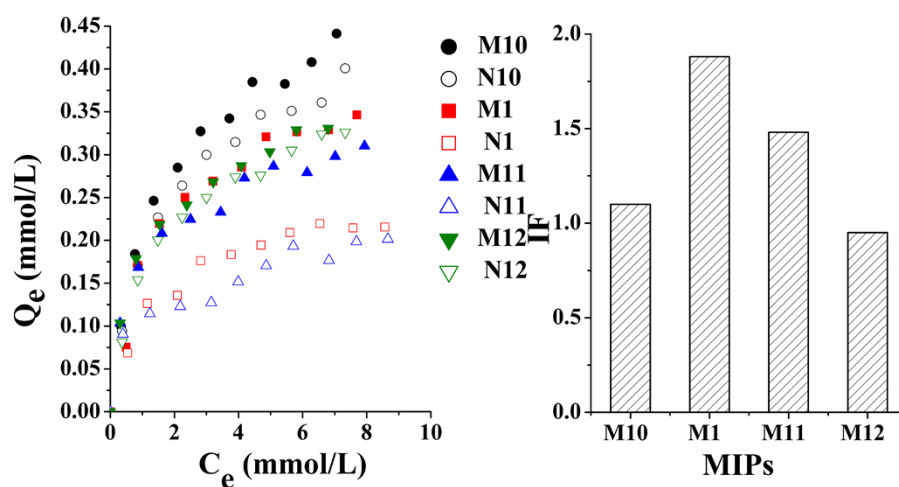

**Fig. S9** Adsorption isotherms of LEFX on the MIPs and NIPs with different degree of cross linking.  $V=3.0$  mL,  $C_0=0-10$  mmol/L,  $t=5$  h, 20 mg of the polymers. M10, N10: 75%; M1, N1:80%; M11, N11: 83%; M12, N12:85%.



**Table S1** Adsorption parameters of polymers

| Model      | Fited parameters    | M1     | N1     |
|------------|---------------------|--------|--------|
| Langmuir   | $Q_{\max}$ (mmol/g) | 0.138  | 0.040  |
|            | $b$ (L/mmol)        | 0.154  | 0.750  |
|            | $R^2$               | 0.992  | 0.992  |
| Freundlich | $K_F$ (L/g)         | 0.0229 | 0.0173 |
|            | $1/n$               | 0.58   | 0.35   |
|            | $R^2$               | 0.983  | 0.917  |

**Table S2** The swelling rate of the polymers in different solvent

| Polymers | Water  | PBS (pH 7.40) | Ethanol |
|----------|--------|---------------|---------|
| M1       | 4.17 % | 6.67 %        | 11.93 % |
| N1       | 9.00 % | 9.28 %        | 14.60 % |
| P3       | 3.27 % | 3.99 %        | 3.62 %  |
| NP3      | 2.41 % | 3.79 %        | 2.91 %  |

**Table S3.** Fitting data of kinetic binding on M1 and N1.

|    | Pseudo-first-order         |                |                | Pseudo-second-order |                |                |
|----|----------------------------|----------------|----------------|---------------------|----------------|----------------|
|    | $k_1$ (min <sup>-1</sup> ) | $Q_e$ (mmol/g) | R <sup>2</sup> | $k_2$ (g/mmol/min)  | $Q_e$ (mmol/g) | R <sup>2</sup> |
| M1 | 0.0252                     | 0.6181         | 0.988          | 111.00              | 0.7892         | 0.996          |
| N1 | 0.0327                     | 0.5101         | 0.978          | 128.61              | 0.2795         | 0.989          |
